# Supplementary material for: Electrochemical sensor for simultaneous determination of trifluoperazine and dopamine in human serum based on graphene oxide–carbon nanotubes/iron–nickel nanoparticles
Source: Royal Society of Chemistry journal article supplement (doi:10.1039/d3ra04334g), 2023-01-01
Supplement: d3ra04334g1.pdf [file d3ra04334g1.pdf]

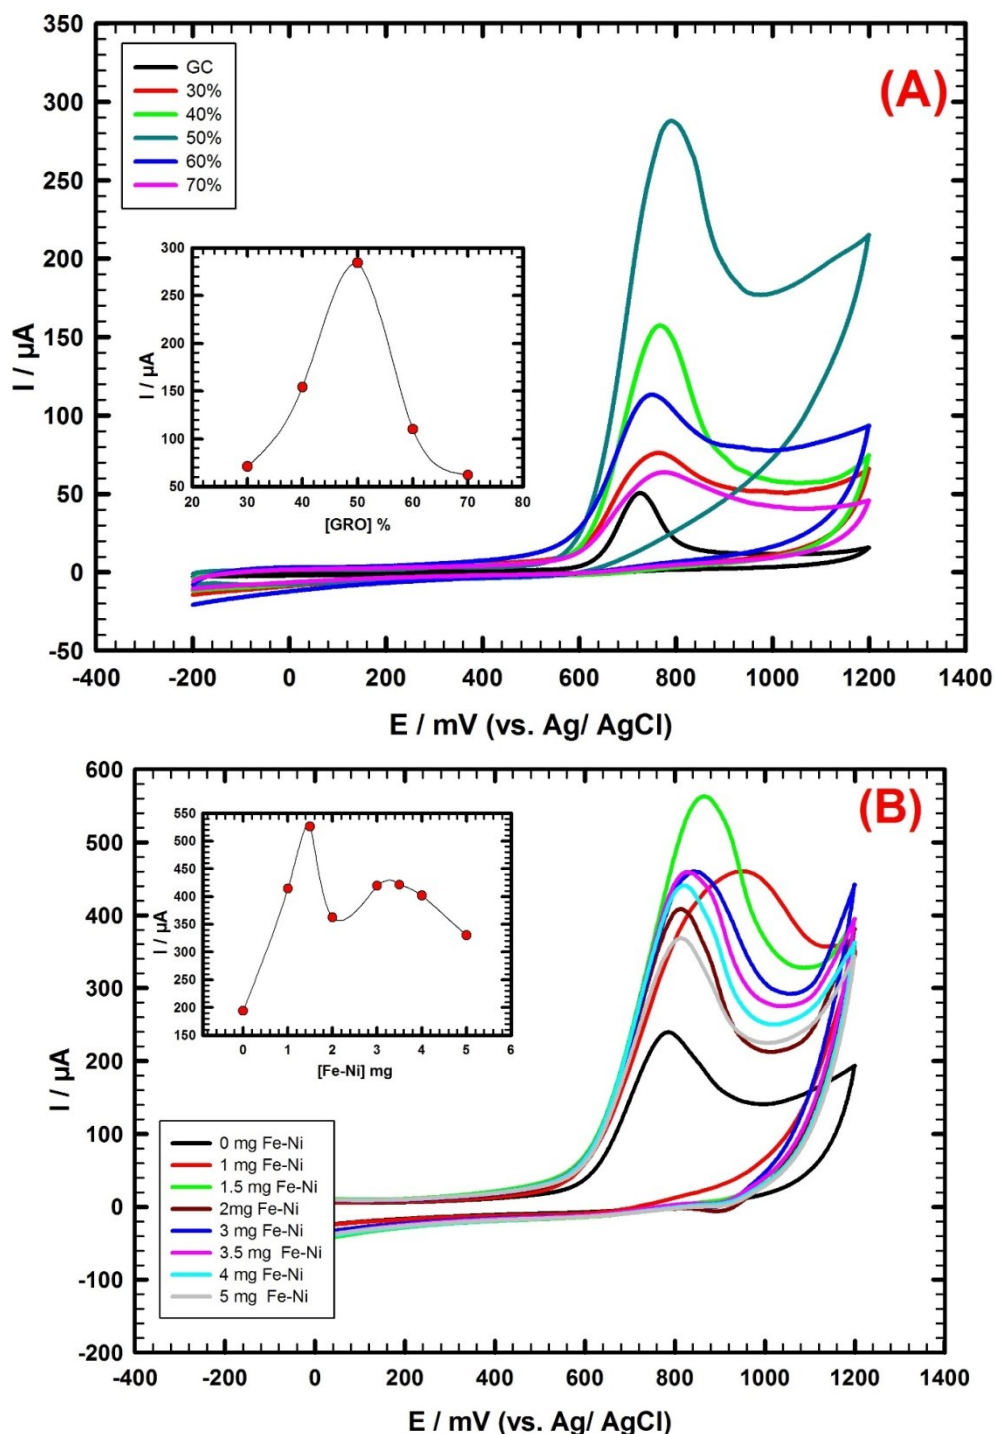

**Supplement Figure 1.** A) Effect of varying the percentage of GRO mixed with CNT on the CVs of 1.0 mM TFLP in 0.1 M PBS (pH 7.0); scan rate is  $50 \text{ mV.s}^{-1}$ ; inset: relation between oxidation peak current of TFLP and percentage of GRO. B) Effect of varying the amount of Fe-Ni on the CVs of 1.0 mM TFLP in 0.1 M PBS (pH 7.0); scan rate is  $50 \text{ mV/s}$ ; inset: relation between oxidation peak current of TFLP and amount of Fe-Ni.

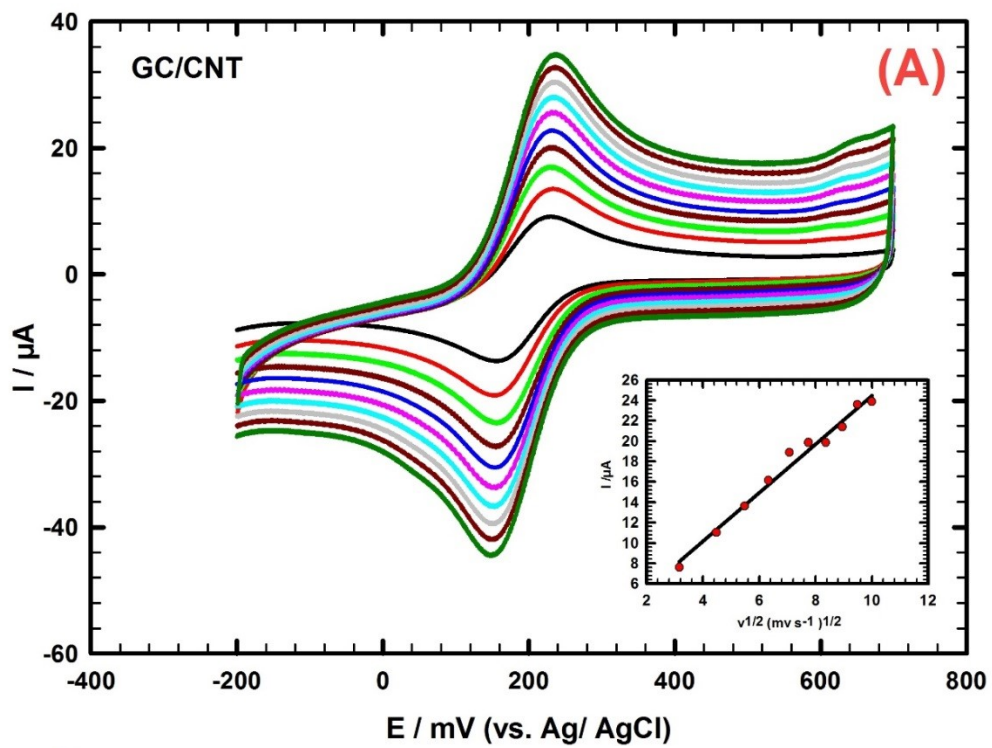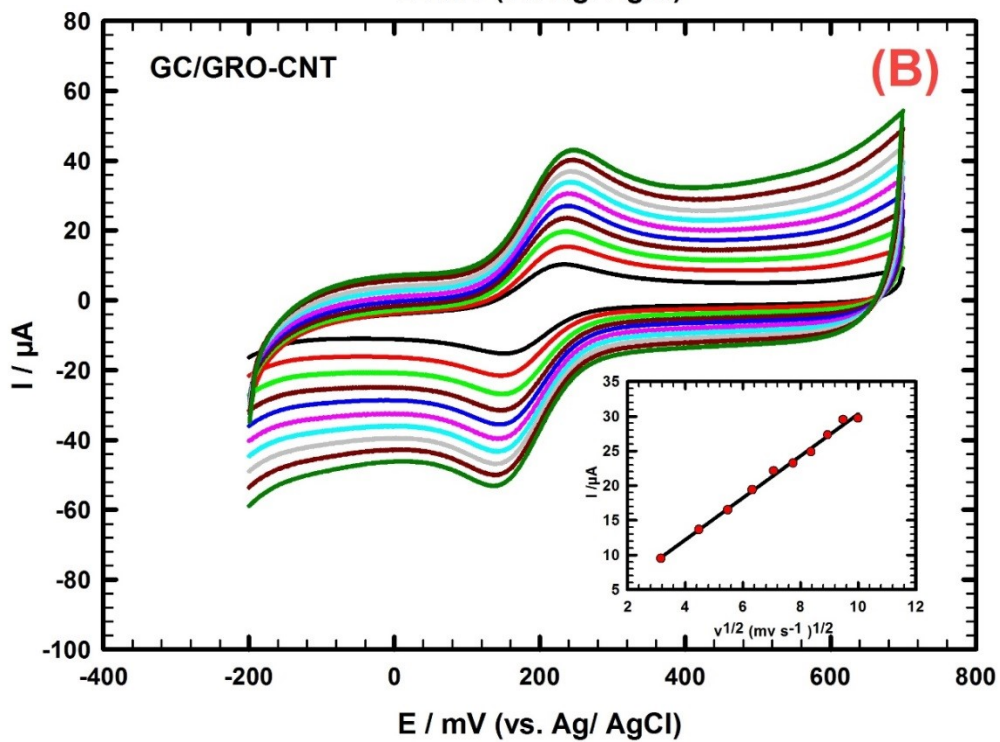

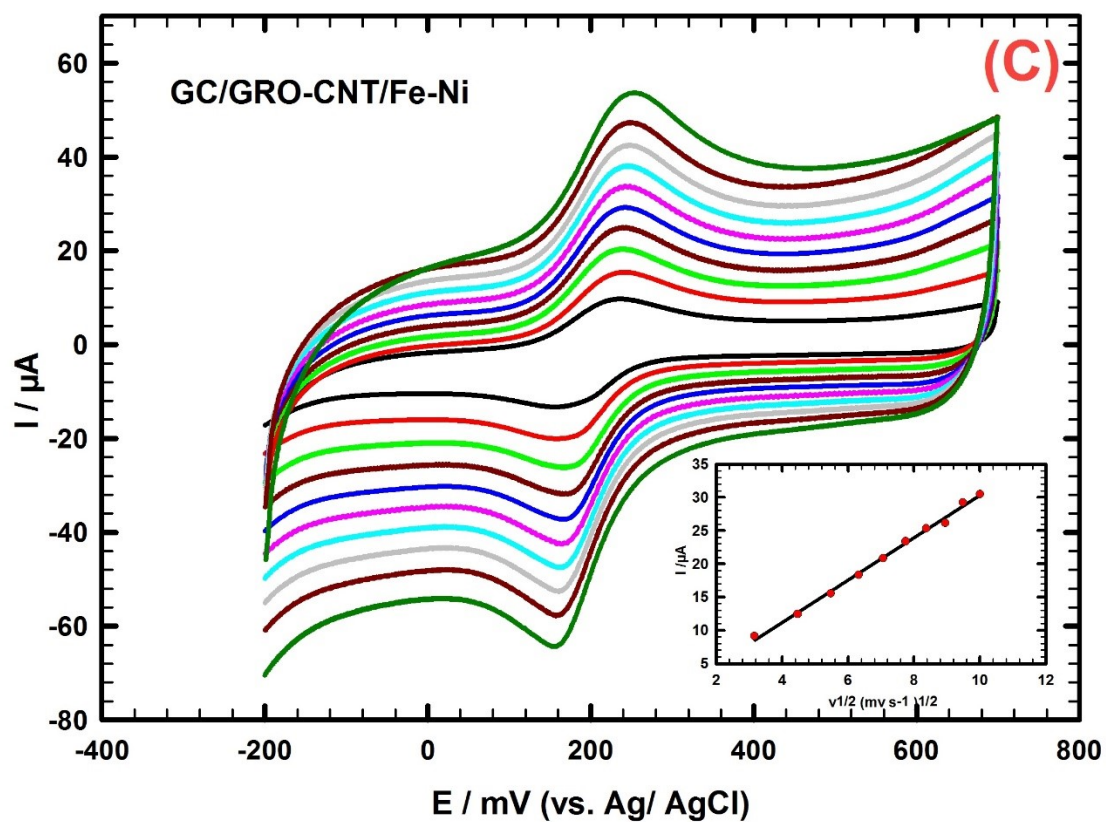

**Supplement Figure 2 (A-C):** CV experiments in 1.0 mM  $K_3[Fe(CN)_6]$  system using different electrodes GC/CNT, GC/GRO-CNT, GC/GRO-CNT/Fe-Ni, respectively. Insets: Corresponding relations between oxidation peak current and square root of scan rate.

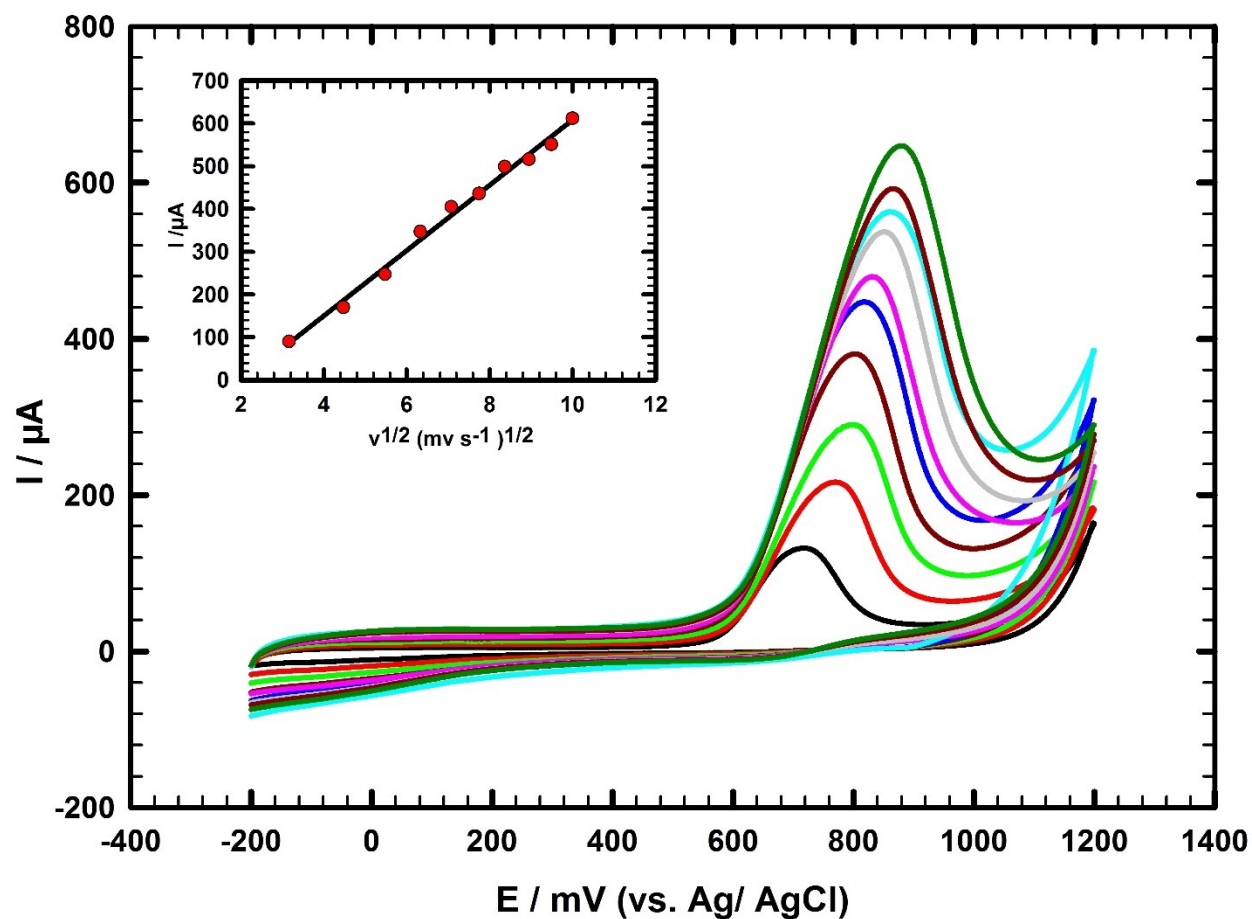

**Supplement Figure 3:** Effect of varying the scan rates on the CVs of 1.0 mM TFLP in 0.1 M PBS (pH 7.0); inset: relation between oxidation peak current and square root of scan rate.

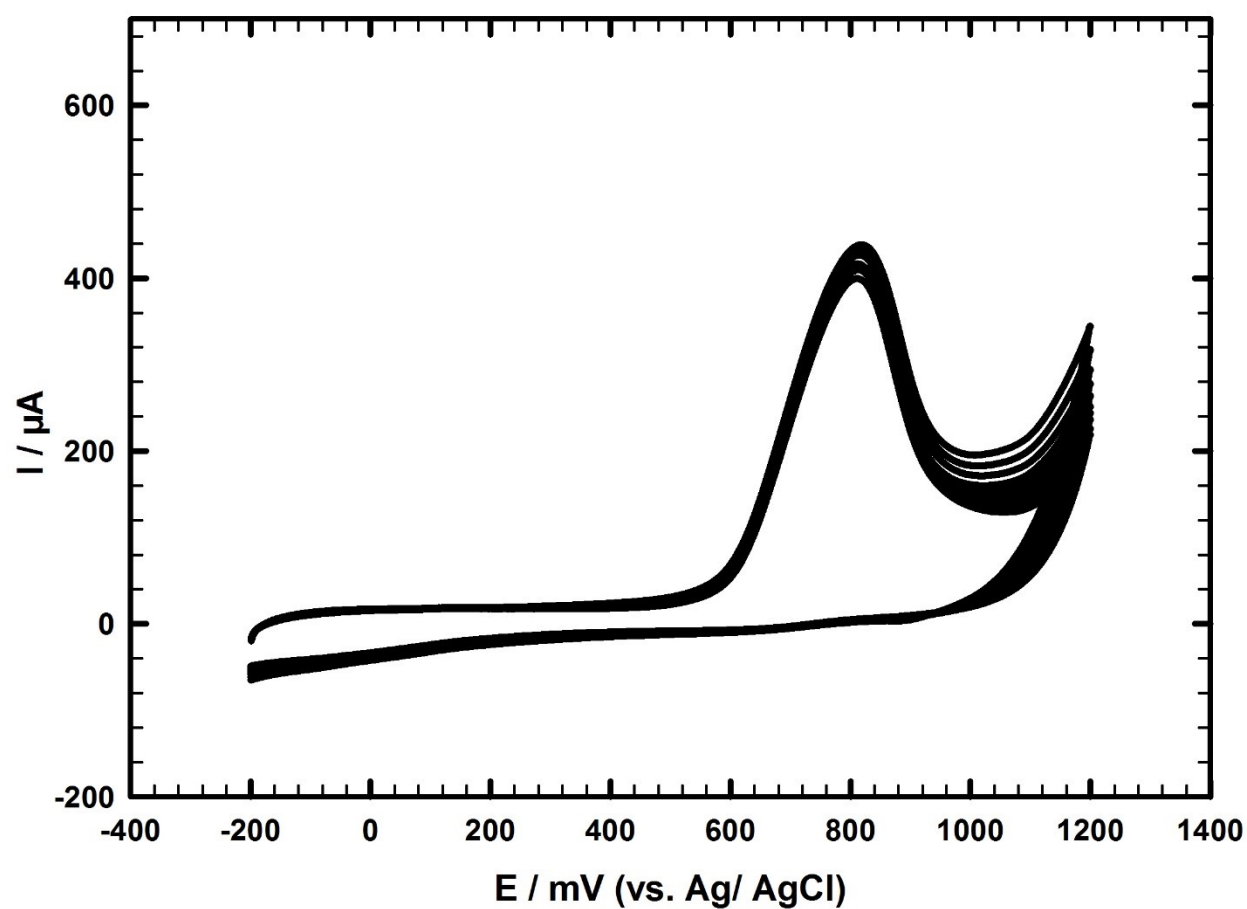

**Supplement Figure 4:** Repeated CVs (25 cycles) for examining the current response stability of GC/GRO-CNT/Fe-Ni electrode in 1.0 mM TFLP/0.1 M PBS (pH 7.0); scan rate is  $50 \text{ mV}\cdot\text{s}^{-1}$

**Supplement Table 1:** The devices used in this work.

| <b>Instrument</b>                                                                                                                         | <b>Uses</b>                                               |
|-------------------------------------------------------------------------------------------------------------------------------------------|-----------------------------------------------------------|
| BAS-Epsilon electrochemical equipment with a cell contained three electrodes (GCE ( $\Phi$ : 3 mm), platinum wire and Ag/AgCl (3 M KCl)). | Voltammetry measurements                                  |
| Quanta 250 FEG instrument                                                                                                                 | Scanning electron microscopy FE-SEM measurement           |
| Quanta 250 FEG instrument                                                                                                                 | Energy dispersive X-ray spectroscopy (EDAX) measurement   |
| JEM-2100 (JEOL Ltd., Japan)                                                                                                               | High resolution transmission electron microscope (HRTEM). |

Supplement Table 2: Comparison of figures of merit for GC/GRO-CNT/Ni-Fe with different modified electrodes mentioned in literature for TFLP determination.

| Modified electrodes                          | Linearity range ( $\mu\text{M}$ ) | Detection limit (M)    | Sensitivity ( $\mu\text{A}/\mu\text{M}$ ) | Stability (% RSD) | Accuracy (% RSD) | Ref       |
|----------------------------------------------|-----------------------------------|------------------------|-------------------------------------------|-------------------|------------------|-----------|
| MWCNT/GCE                                    | 0.021–1.7                         | $0.7 \times 10^{-9}$   | 1.20                                      | 1.98              | 2.87             | 2         |
| DMSA/Fe <sub>3</sub> O <sub>4</sub> /RGO/CPE | 1–50                              | $54 \times 10^{-8}$    | 0.0337                                    | 2.4               | 2.4              | 3         |
| ABSA/SWCNT/GCE                               | 0.1–10                            | $1 \times 10^{-9}$     | 0.314                                     | 3.1               | 3.2              | 37        |
| NCO-500/SPCE                                 | 0.025–100.9                       | $7 \times 10^{-9}$     | 1.704                                     | 1.76              | 1.38             | 44        |
| MCP-MWCNT/CPE                                | 0.5–167                           | $1.1 \times 10^{-7}$   | 1.294                                     | 2.0               | 1.80             | 46        |
| BDDE                                         | 1–37                              | $7 \times 10^{-7}$     | 0.0193                                    | 3.8               | -                | 47        |
| Decanethiol SAM/AuE                          | 0.5–30                            | $3 \times 10^{-8}$     | 0.245                                     | 1.5               | -                | 48        |
| GC/ CNT-GRO/Fe-Ni                            | 0.008 -24                         | $1.057 \times 10^{-9}$ | 3.602                                     | 1.62              | 2.32             | This work |

DMSA: Dimercaptosuccinic acid; ABSA: Aminobenzene sulfonic acid; NCO: Ni@CeO<sub>2</sub> nanoparticles; MCP: m-cresol purple; BDDE: Boron-doped diamond electrode; Decanethiol SAM/AuE: Decanethiol Self-assembled monolayer/gold electrode.
